# Supplementary material
Source: PubMed Central journal article supplement (PMC4037340)

# Supporting Information Figure S1

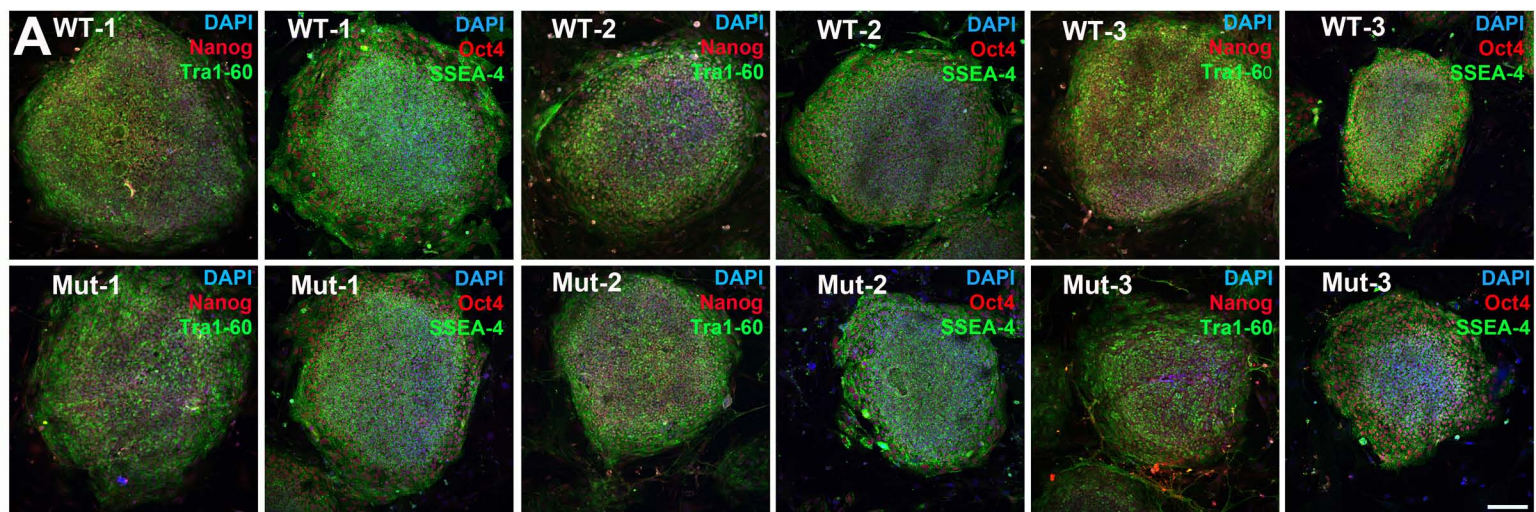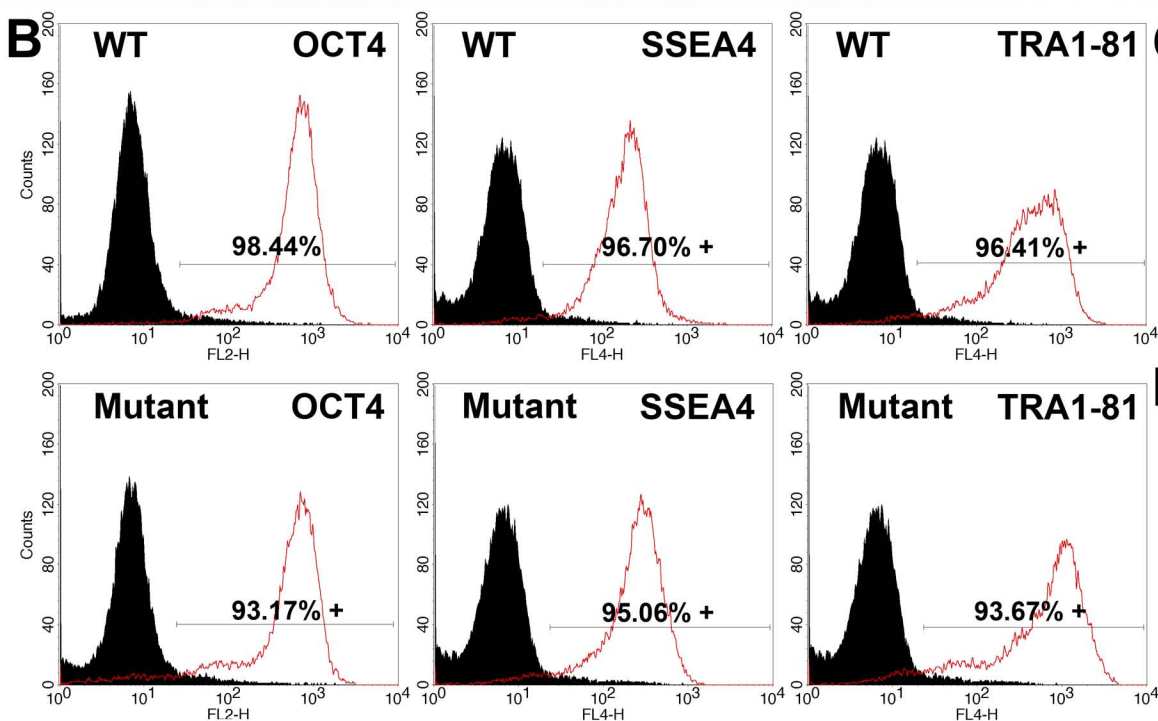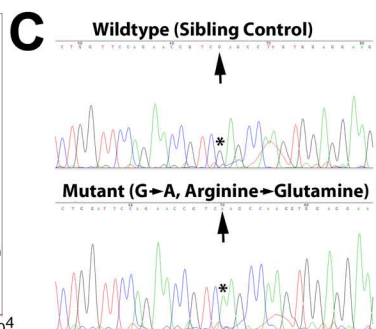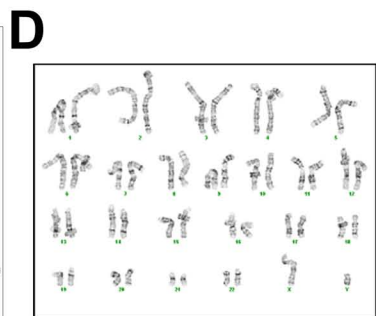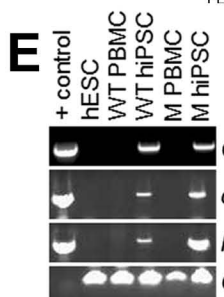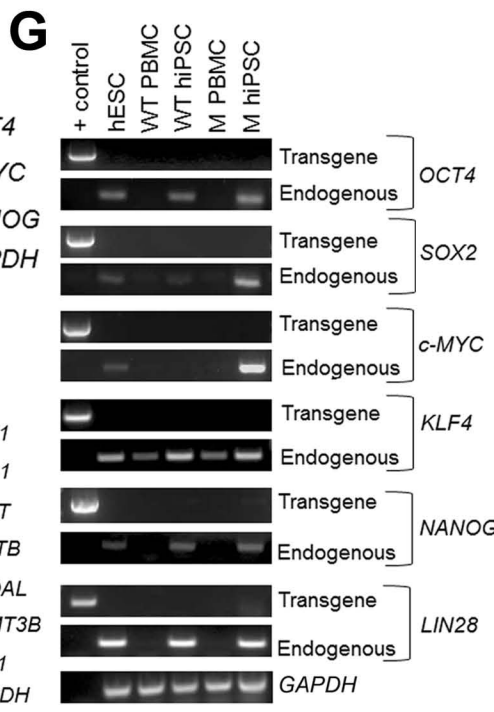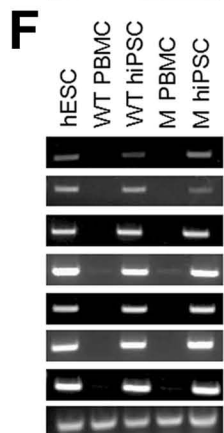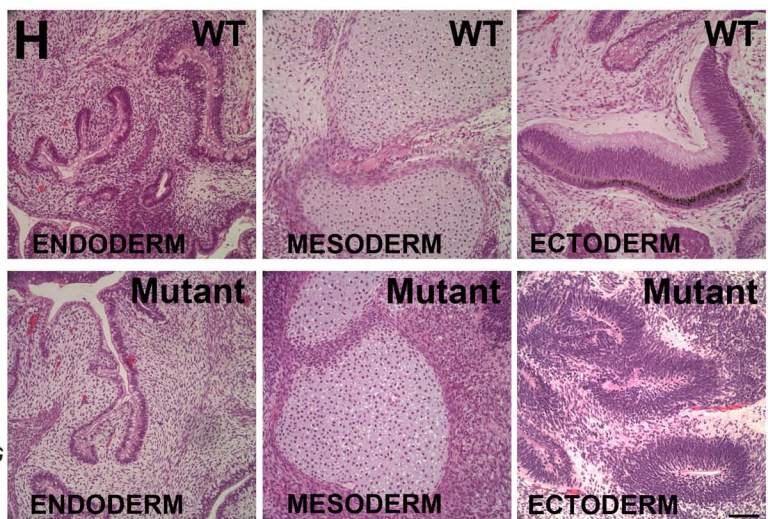

## Supporting Information Figure S2

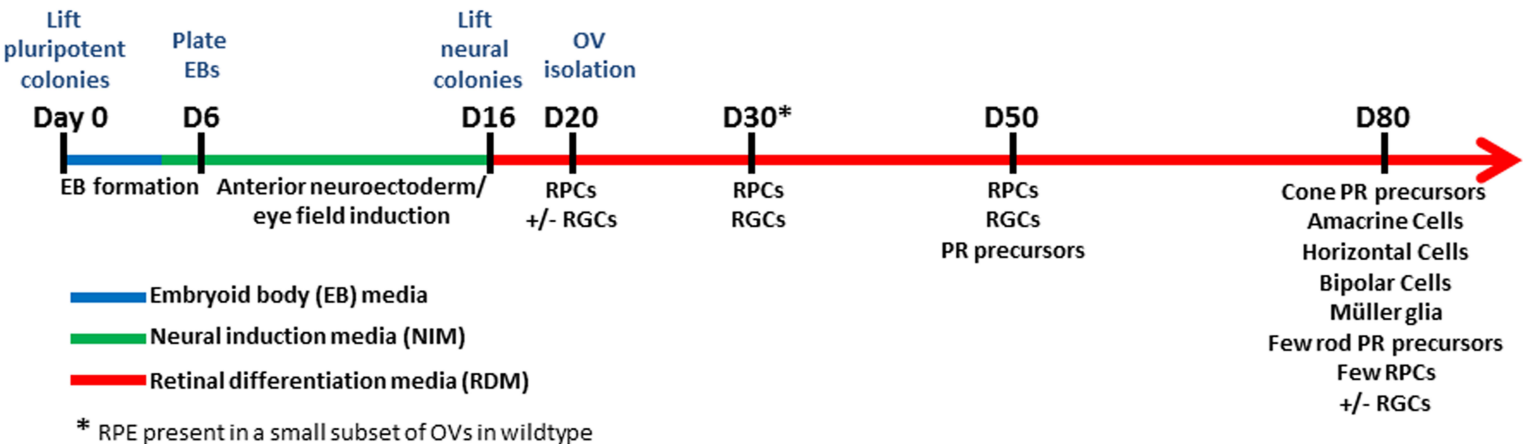

# Supporting Information Figure S3

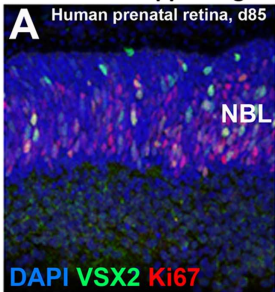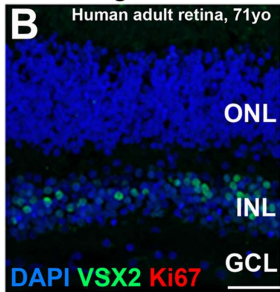

# Supporting Information Figure S4

**WT**

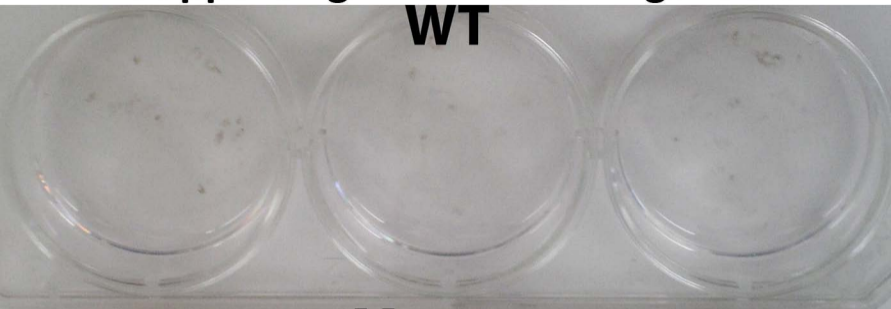

**Mutant**

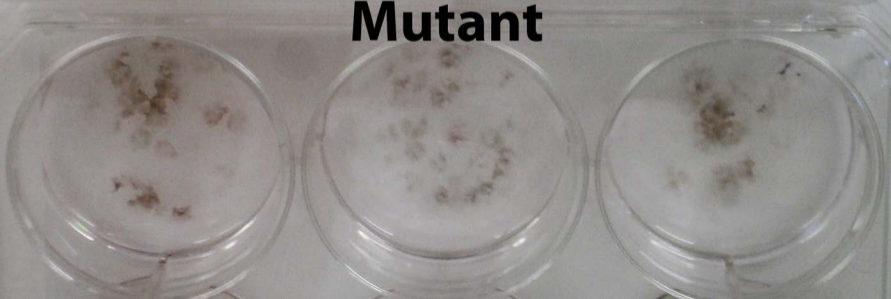

Supporting Information Figure S5

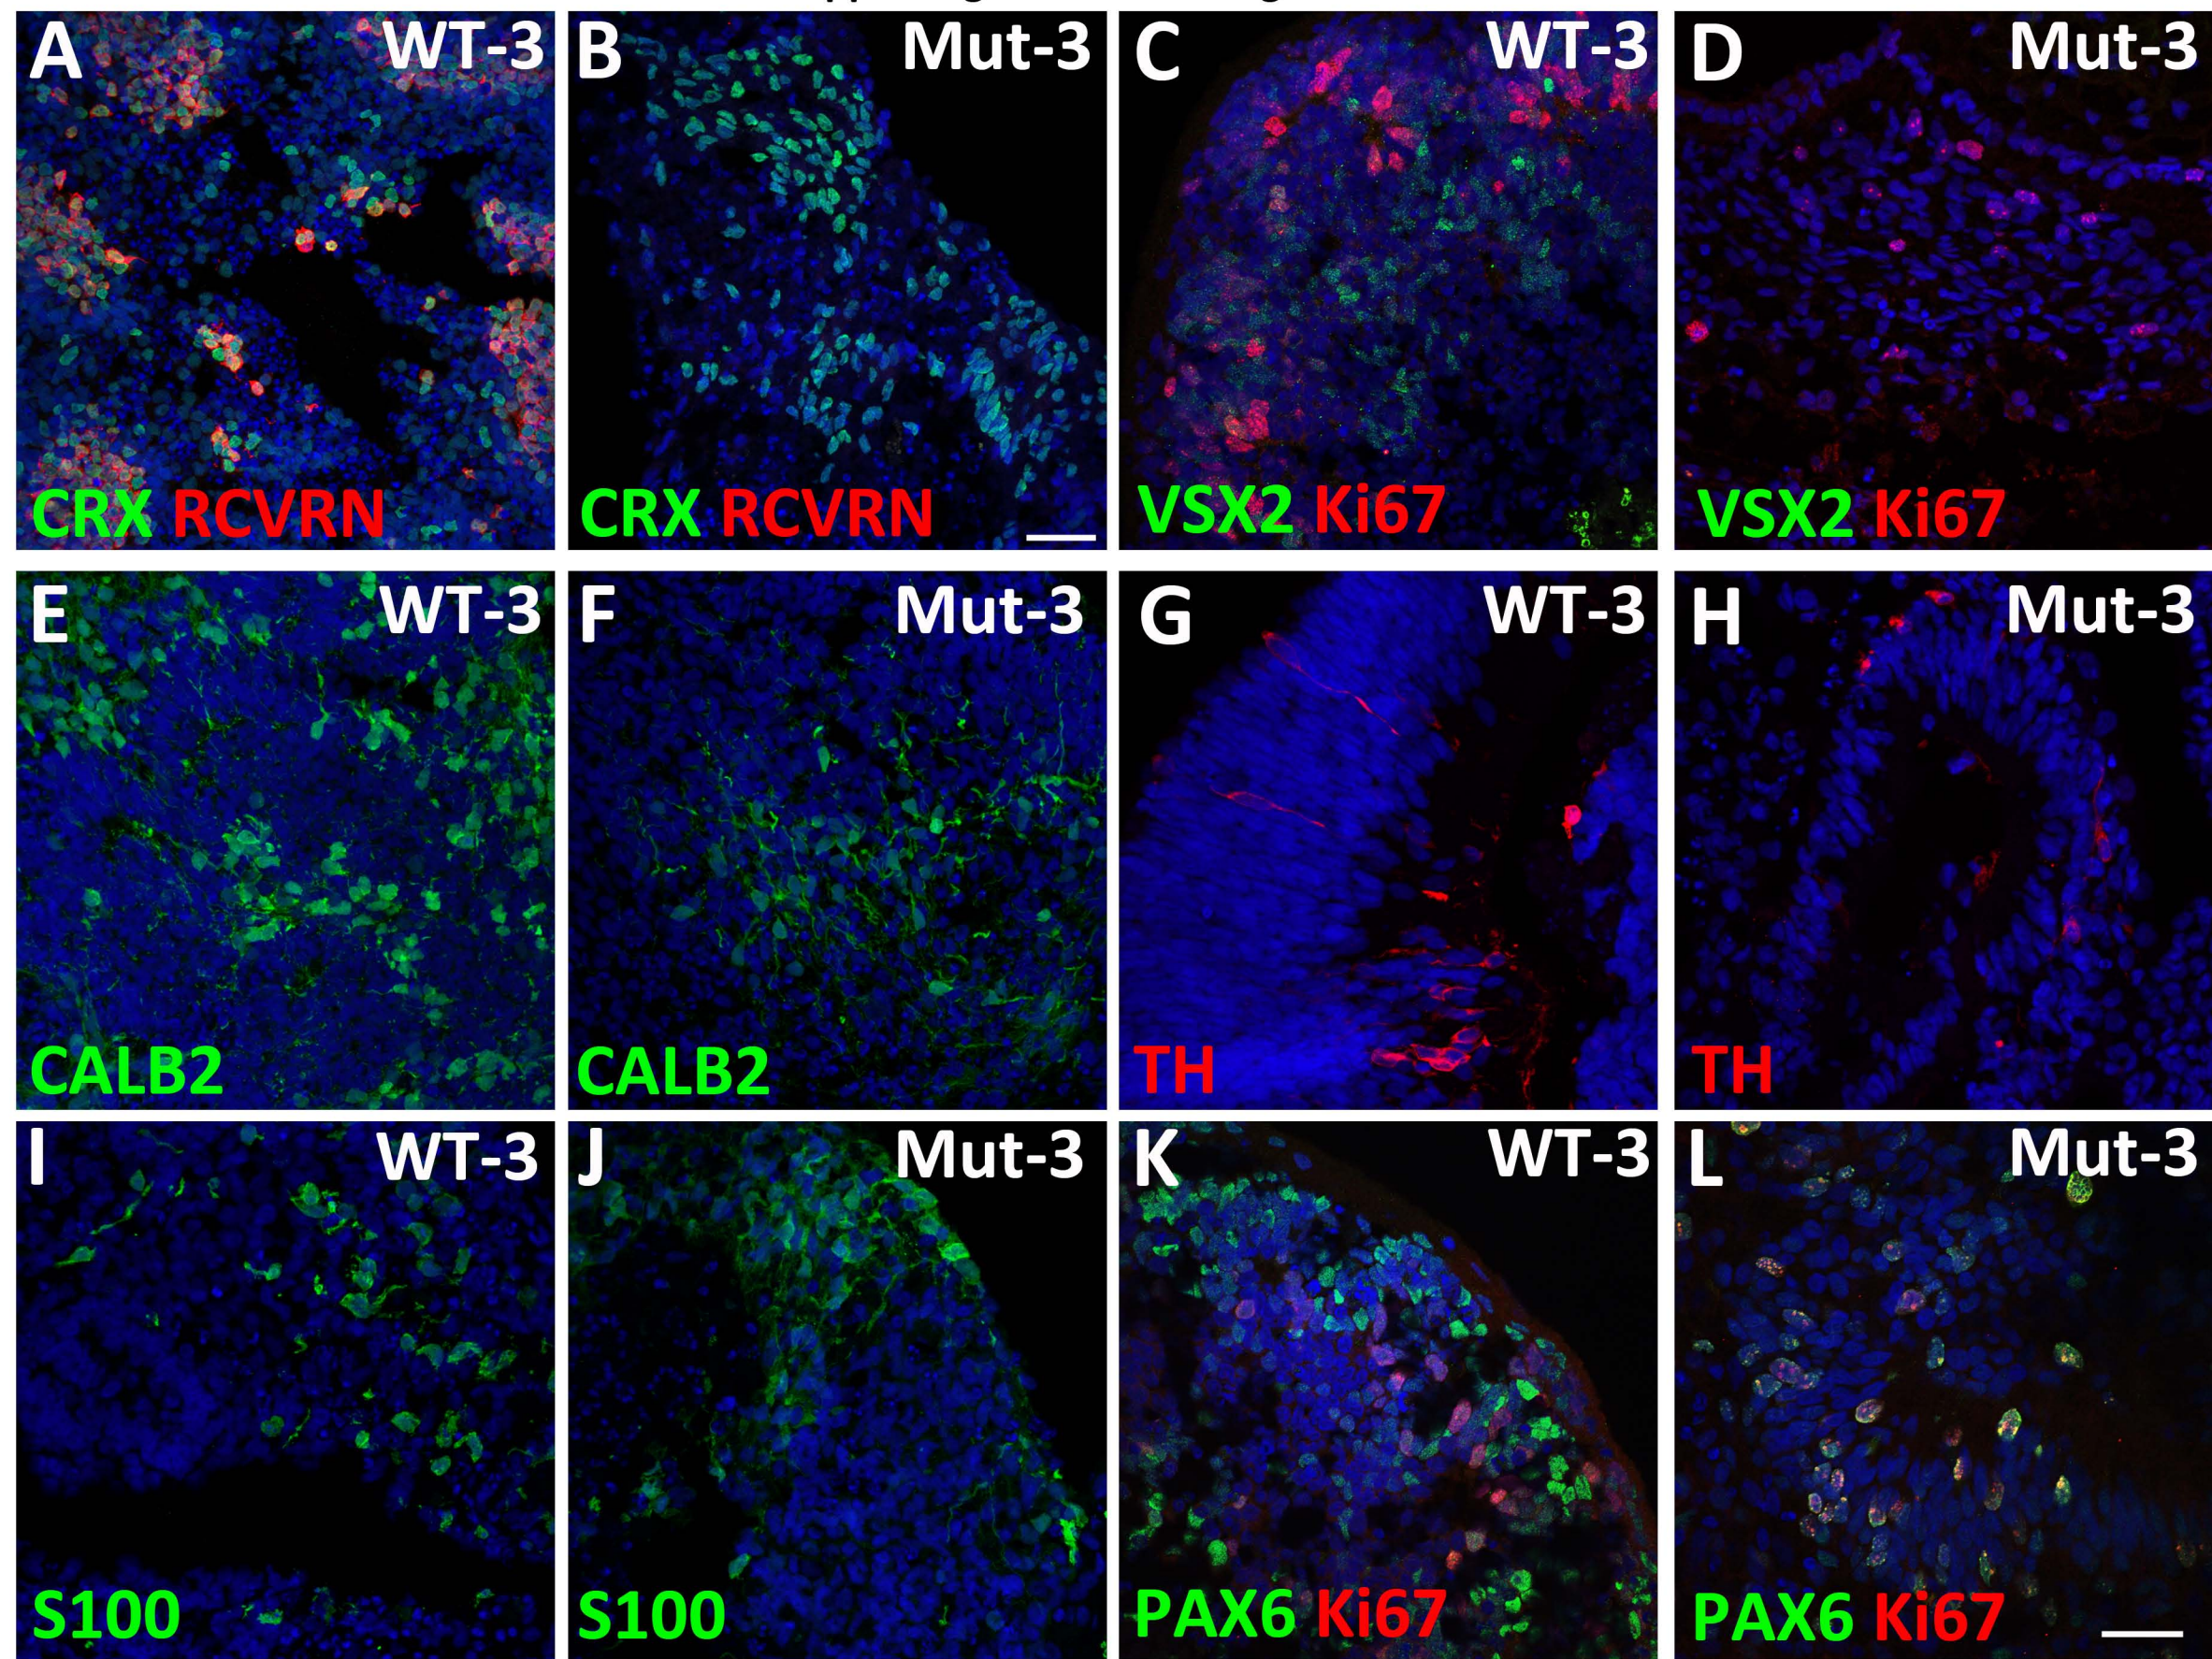

**A** Mutant Control

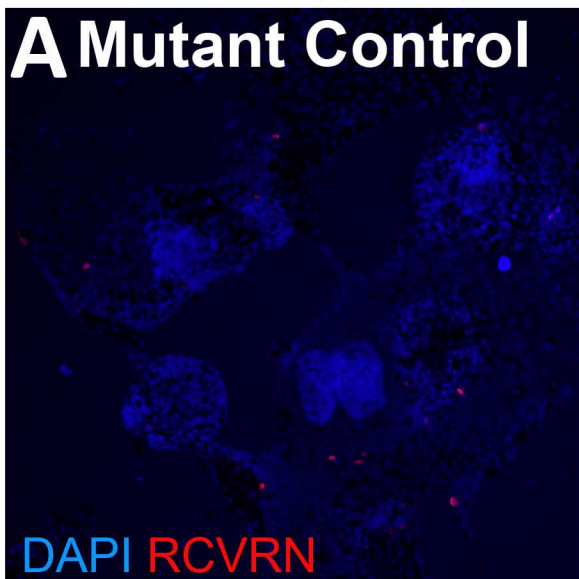

**B** Lenti-VSX2

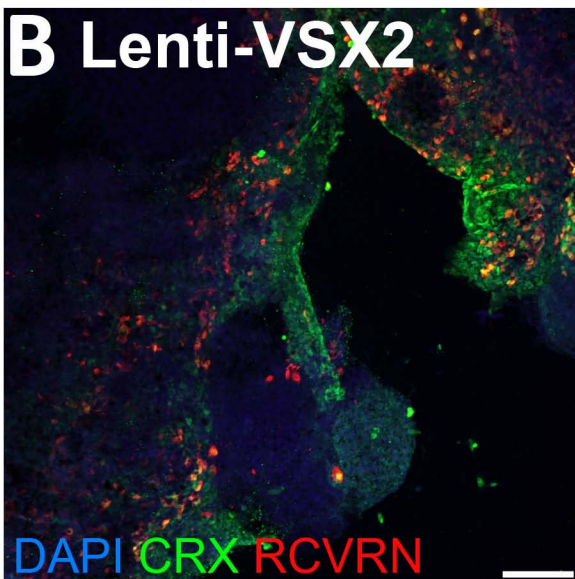

**C** Lenti-VSX2

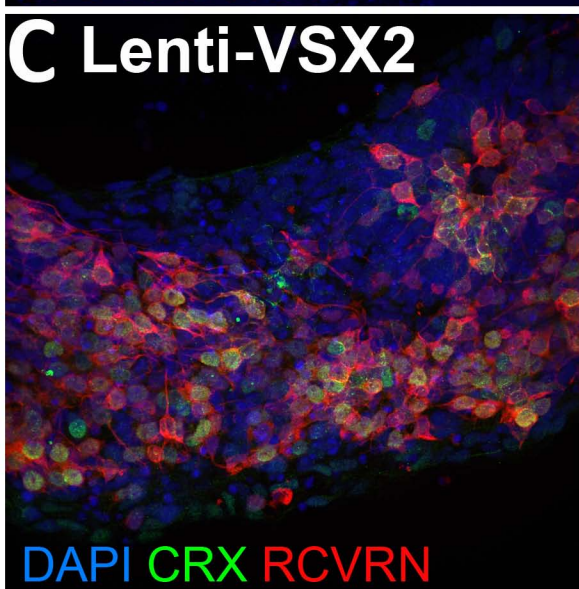

**D** Lenti-VSX2

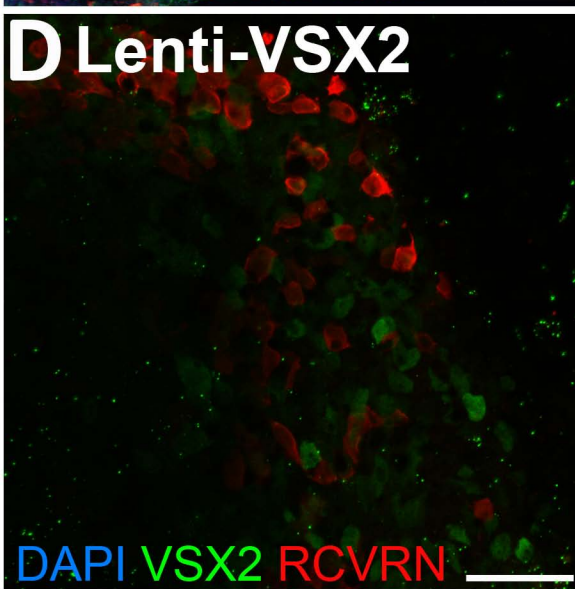

# Supporting Information Figure S7

## Day 20

### A

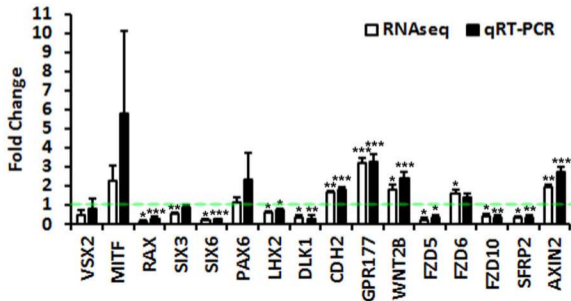

## Day 30

### B

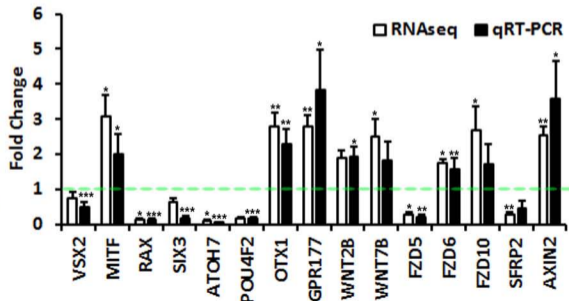

Supplement: NIHMS566447-supplement-Supp_Fig_S1-S7.pdf [file NIHMS566447-supplement-Supp_Fig_S1-S7.pdf]
